# Supplementary material for: Novel lamprey antibody recognizes terminal sulfated galactose epitopes on mammalian glycoproteins
Source: PubMed Central journal article supplement (PMC8175384; doi:10.1038/s42003-021-02199-7), 2021-06-03
Supplement: 42003_2021_2199_MOESM1_ESM.pdf [file 42003_2021_2199_MOESM1_ESM.pdf]

## Supplementary Material for:

### Novel Lamprey Antibody Recognizes Terminal Sulfated Galactose Epitopes on Mammalian Glycoproteins

Tanya R. McKittrick<sup>1,#</sup>, Steffen M. Bernard<sup>2,#</sup>, Alexander J. Noll<sup>1,3,#</sup>, Bernard C. Collins<sup>2</sup>, Christoffer K. Goth<sup>1,4</sup>, Alyssa M. McQuillan<sup>1</sup>, Jamie Heimburg-Molinaro<sup>1</sup>, Brantley R. Herrin<sup>5,6</sup>, Ian A. Wilson<sup>2,7</sup>, Max D. Cooper<sup>3</sup> and Richard D. Cummings<sup>1,8</sup>

<sup>1</sup>Dept. of Surgery, Beth Israel Deaconess Medical Center, Harvard Medical School, Boston, MA, 02215, U.S.A.

<sup>2</sup>Dept. of Integrative Structural and Computational Biology, The Scripps Research Institute, La Jolla, CA, 92037, U.S.A.

<sup>3</sup>Current address: Enteric Disease Dept., Naval Medical Research Center, Silver Spring, MD, U.S.A.

<sup>4</sup>Current address: Dept. of Biomedical Sciences, University of Copenhagen, Copenhagen, Denmark

<sup>5</sup>Dept. of Pathology and Laboratory Medicine, Emory Vaccine Center, Emory University School of Medicine, Atlanta, GA, 30322, U.S.A.

<sup>6</sup>Current address: Acceleron Pharma, Boston, MA, U.S.A.

<sup>7</sup>The Skaggs Institute for Chemical Biology, The Scripps Research Institute, La Jolla, CA, 92037, U.S.A.

#These authors contributed equally to this work

<sup>8</sup>To whom correspondence should be addressed:

Richard D. Cummings, Ph.D., Email: [rcummin1@bidmc.harvard.edu](mailto:rcummin1@bidmc.harvard.edu)

## Supplementary Results

### *Results of Glycoprotein Microarray Optimization Experiments*

A number of variables were optimized for the glycoprotein microarray. These included the method of slide attachment, concentration for printing, attachment efficiency, slide blocking, washing method, and carrier identity and concentration.

For the printing solution, 0.1M sodium phosphate pH 8.0 buffer was initially used since this buffer has been used for in-house printing onto NHS slides. Upon finding that nitrocellulose was superior to NHS as the printing substrate (as described below), the 0.1M sodium phosphate pH 8.0 buffer was no longer a requirement. Instead, PBS was chosen as the buffer since this buffer was found to improve stability and solubility of some other glycoproteins vs. the 0.1M sodium phosphate pH 8.0 buffer, likely because of the presence of saline. Indeed, all glycoprotein samples utilized to date have been efficiently solubilized in PBS buffer, and the PBS buffer is well-tolerated by the microarray printer. However, the printing solution was not further optimized (for example, with detergents, trehalose or other viscosity normalizers, or carrier molecules such as BSA) beyond the use of PBS due to the efficiency of PBS and the fact that some glycoproteins (ex. transferrin) are highly susceptible to precipitation by some of these additional components.

For slide attachment, nitrocellulose and N-hydroxysuccinimide (NHS) slides were tested with a panel of glycoproteins, especially the mucins since these glycoproteins are especially difficult to handle. This mucin microarray was screened with PNA, a lectin that recognizes the Core 1 mucin-type O-glycan structure Gal $\beta$ 1-3GalNAc, which was expected to be present on all of these mucin samples. It was found that printing on

nitrocellulose gave >10-fold greater sensitivity of detection vs. NHS slides with 10µg/ml PNA (**Supplementary Figure S7a, Supplementary Data 6**) and much lower intra-spot standard deviations of pixel fluorescence (data not shown). This can be more clearly seen by comparing the actual microarray images (**Supplementary Figure S7b**), which showed a regular circular pattern for PNA binding on the NC slide but irregular, non-circular, and diffuse binding on the NHS slides. Moreover, while binding to mucins on the nitrocellulose slide could be detected with 1µg/ml PNA, only 10µg/ml PNA led to weak binding to the mucins on the NHS slide. This irregular spot shape on the NHS slides was likely because of the low lysine content on mucins and hence more quantitative attachment of mucins to nitrocellulose vs. NHS slides. Due to the large number of mucins and mucin-like glycoproteins used on subsequent glycoprotein microarray versions, nitrocellulose was selected as the primary substrate for printing.

For concentration optimization, 1, 10, and 100µg/ml of the mucins were printed on nitrocellulose slides. Concentrations higher than 100µg/ml were not utilized since higher concentrations caused the mucin solutions to become too viscous for efficient and reproducible filtering and printing. It was found that only the 10 and 100µg/ml but not 1µg/ml mucin spots were detectable by the lectins ConA and RCA-I, with a dose-dependent binding effect (**Supplementary Figure S8a,b, Supplementary Data 7**). This dose-dependent binding to the 10 and 100µg/ml spot suggested that the glycoprotein spot was not saturated for at least the 10µg/ml print concentration. PNA binding to the mucin microarray (**Supplementary Figure S7a**) gave a similar result binding to only the 10 and 100µg/ml spots as did other plant lectins including AAL and SNA (data not shown). However, binding to the 10µg/ml spots was typically low sensitivity (low RFU)

and highly variable between replicates, resulting in %CV values >20% in many cases. These results thus pointed to 100µg/ml as the preferable print concentration. Further confirmation of 100µg/ml as the preferred printing concentration came from screenings on the glycoprotein microarray platform that contained multiple glycoproteins in addition to mucins. On this glycoprotein microarray, only the 100µg/ml print concentration was typically bound and, in cases where the 10µg/ml glycoprotein spots were bound, the binding was weak and highly variable (data not shown). Higher lectin concentrations allowed detection of the 10µg/ml samples, but these higher lectin concentrations may cause cross-reactivity to lower affinity determinants, cause non-specific binding, and/or not be practical in some cases with precious samples. Due to the fact that only a very small amount of glycoprotein is printed on a single slide (specifically, nanograms for a 16-subarray format as used for the current glycoprotein microarray platform), it was concluded that 100µg/ml glycoprotein was the optimal concentration for printing. Although higher concentration than 100µg/ml may promote even higher sensitivity, this is not practical since some glycoproteins such as the mucins were too viscous to quantitatively and reproducibly handle at concentrations higher than 100µg/ml.

Despite the sensitivity of the nitrocellulose platform, the background fluorescence was still quite high, as exemplified in **Supplementary Figure S7b** for the 10µg/ml PNA screening. This high background was consistently detectable and became exacerbated when the 488nm laser and Standard Blue channel was used (ex. using Alexa Fluor 488-labeled secondary probes). Nitrocellulose is known to exhibit high autofluorescence, especially at lower wavelengths, which contributes to the high background along with non-specific nitrocellulose binding by the screened protein [2, 3]. However, different

nitrocellulose slide manufacturers claim to have reduced this autofluorescence. Thus, it was of interest to compare the results of screening the same plant lectin on mucin microarrays printed on two different nitrocellulose slides. The slides chosen were FAST slides from Whatman and NOVA slides from Grace-Bio. Mucin microarray printing and mucin immobilization efficiency were similar between these two slides types (data not shown), but it was found that the binding on the NOVA slides gave higher signal:noise ratios (SNRs) and lower background fluorescence intensities than on FAST slides (**Supplementary Figure S9a-c, Supplementary Data 8**). Additionally, SuperNOVA slides from Grace-Bio were also used for glycoprotein microarray printing and were found to give very high SNRs (with RFU values as low as 100 RFU sometimes being detected with  $SNR \geq 5.000$ , the set SNR cutoff for a bound vs. unbound glycoprotein), although a side-by-side comparison with NOVA slides was not tested. Due to the claim by Grace-Bio of reduced background and higher sensitivity of the SuperNOVA vs. NOVA slides and the high sensitivity binding detected in-house, SuperNOVA slides from Grace-Bio were chosen as the slide type to be used for the glycoprotein microarray.

Another variable that was optimized was the nitrocellulose blocking agent. As described above, non-specific nitrocellulose binding is one of two major factors that promote background fluorescence. The addition of a blocking agent substantially reduces this non-specific nitrocellulose binding, but the blocking agent itself may also be non-specifically bound by the screened sample. For these reasons, the blocking agent was optimized. It was found in preliminary studies that 1% w/v BSA gave greater sensitivity and a similar background binding vs. 1% w/v nonfat milk as the blocking agent (data not shown). Additionally, protein and non-protein blockers can be used for

blocking the SuperNOVA nitrocellulose slide, and the Super G Blocking Agent has been promoted as giving superior sensitivity vs. protein-based blocking agents for protein microarrays. Thus, the 1% w/v BSA blocking agent was compared to Super G Blocking Buffer. Specifically, an anti-Blood Group H Type 1- (anti-H1) specific antibody was utilized for this testing because this antibody was consistently seen to give very high background binding to the glycoprotein microarrays during quality control screenings to assess proper glycoprotein glycosylation. This higher than usual background was likely because of the fact that this antibody is a crude ascites fluid sample rather than a purified monoclonal antibody, and in some cases the background binding was very extreme and made the SNR too low for accurate classification of binders. The readout of interest was the SNR, which was expected to be consistently higher for all bound glycoproteins if one of the two blocking agents was superior at reducing background. The results clearly demonstrated that Super G Blocking Buffer was superior to 1% BSA as the blocking agent, resulting in consistently higher SNRs (**Supplementary Figure S10, Supplementary Data 9, 10**). Super G Plus Preservative solution from Grace-Bio combines the blocking of Super G Blocking Buffer with a preservative for long-term -20°C storage of protein microarrays. Testing of Super G Plus as a blocking agent showed that this blocker also produced significantly high sensitivity (data not shown), although a side-by-side comparison with Super G Blocking Buffer for SNR and long-term sensitivity was not tested. Nonetheless, we did notice an increase in non-specific protein binding when the slides were stored at -20°C unblocked and then blocked with Super G Blocking Buffer prior to experimentation, an issue that has not yet been seen to

date with slides blocked with Super G Plus. For these reasons, Super G Plus was chosen as the blocking agent for glycoprotein microarrays.

The method of washing chosen was similar to that of Western blotting, namely four washes for five minutes with a Tween-20-supplemented buffer. TSMWB (20mM Tris pH 7.4, 150mM NaCl, 2mM MgCl<sub>2</sub>, 2mM CaCl<sub>2</sub>, 0.05% v/v Tween-20) was more than sufficient for this washing method. Increased the salt or Tween concentration did not significantly improve SNRs, nor did increasing the number of washes and/or wash time, with screened samples producing relatively higher backgrounds. This does not rule out that some washing conditions may be preferred, so other washing methods may be used if other experiments suggest a preferable washing method for a given sample. However, it was found that one wash with Super G Blocking Buffer was sufficient.

A critical factor requiring optimization is the presence and concentration of carriers in the binding buffer. BSA was typically used as the carrier protein, which also serves an additional benefit of blocking non-specific protein binding. Indeed, it was found that different BSA concentrations in the binding buffer influenced the binding pattern, but the effect appears unique to different samples. For example, 0.1% BSA allowed efficient binding of the plant lectin to the glycoprotein microarray, whereas 10% BSA almost completely prevented SNA binding (**Supplementary Figure S11a, Supplementary Data 11**). The most likely explanation for this BSA inhibition of SNA binding is that BSA preparations are typically contaminated with bound lipids, including glycosphingolipids that may cross-react with SNA, as previously suggested. On the other hand, the binding of the antibody CHO-131, which is specific for sialyl Lewis x on

a Core 2 O-glycan backbone (Gal $\beta$ 1-3(Neu5Ac $\alpha$ 2-3Gal $\beta$ 1-4(Fuca1-3)GlcNAc $\beta$ 1-6)GalNAc $\alpha$ -), was non-specific with 0.1% BSA. CHO-131 was only expected to bind to the sputum mucins, which have been previously shown to express this glycan structure. However, CHO-131 showed binding to a wide variety of glycoproteins in the presence of 0.1% BSA besides the sputum mucins, one of which was the BSA control itself. This result suggested CHO-131 was non-specifically interacting with proteins. However, raising the BSA concentration to 10% in the blocking buffer eliminated this non-specific BSA and glycoprotein binding, resulting in specific binding to only the sputum mucins. Therefore, the BSA concentration in the binding buffer is empirical and must be optimized for each sample. In optimization screenings, multiple BSA concentrations in the binding buffer are thus tested. Additionally, the BSA control on the glycoprotein microarray is useful for knowing the concentration of BSA to use in the binding buffer since this sample should not be bound. If binding to the printed BSA sample occurs, it indicates that a higher BSA concentration in the binding buffer is needed. It was also found that the addition of Super G Blocking buffer to a concentration of 0.1x final also improves the SNR vs. omission of this carrier (**Supplementary Figure S11b**), as has been previously shown by others. Therefore, the binding buffer should be supplemented with 0.1x Super G and an experimentally verified concentration of BSA for optimal results. It should be noted though that the Super G blocking Buffer and Super G Plus have been found to quench fluorophores, including Cy5 and Alexa Fluor 488, and thus cannot be included in any steps beginning at or following the addition of the fluorescently-labeled probe (ex. fluorescently labeled probe's binding buffer or the subsequent wash steps).



**Supplementary Table S1.** O6 recognizes a subset of sulfated CFG glycans which contain a terminal 3-O-SGal. Glycans ordered from high to low binding over 3 concentrations of O6; RFU = relative fluorescence units.

| CFG ID | Glycan Sequence                             | RFU - 2ug | StDev | % CV | RFU - 10ug | StDev | % CV | RFU - 50ug | StDev | % CV |
|--------|---------------------------------------------|-----------|-------|------|------------|-------|------|------------|-------|------|
| 35     | (3S)Galb1-4(6S)GlcNAcb-Sp8                  | 7279      | 152   | 2    | 12602      | 387   | 3    | 18213      | 802   | 4    |
| 37     | (3S)Galb1-4GlcNAcb-Sp8                      | 1950      | 143   | 7    | 7226       | 458   | 6    | 14689      | 805   | 5    |
| 34     | (3S)Galb1-4(6S)GlcNAcb-Sp0                  | 6688      | 471   | 7    | 12643      | 355   | 3    | 13067      | 738   | 6    |
| 36     | (3S)Galb1-4GlcNAcb-Sp0                      | 1616      | 99    | 6    | 6298       | 463   | 7    | 12444      | 259   | 2    |
| 219    | (3S)Galb1-4(Fuca1-3)(6S)GlcNAcb-Sp8         | 929       | 111   | 12   | 3433       | 298   | 9    | 8620       | 645   | 7    |
| 515    | (3S)GalNAcb1-4GlcNAc-Sp8                    | 323       | 33    | 10   | 1958       | 186   | 10   | 5424       | 256   | 5    |
| 22     | 6S(3S)Galb1-4(6S)GlcNAcb-Sp0                | 66        | 17    | 26   | 793        | 98    | 12   | 2064       | 131   | 6    |
| 297    | (6S)Galb1-4(6S)GlcNAcb-Sp0                  | 9         | 4     | 45   | 75         | 16    | 21   | 176        | 31    | 18   |
| 44     | (6S)Galb1-4GlcNAcb-Sp8                      | 1         | 1     | 170  | 54         | 19    | 34   | 134        | 44    | 33   |
| 25     | (3S)Galb1-4Glc-Sp8                          | 2         | 5     | 224  | 17         | 4     | 21   | 121        | 20    | 16   |
| 26     | (3S)Galb1-4(6S)Glc-Sp0                      | 3         | 5     | 170  | 1          | 3     | 339  | 63         | 5     | 8    |
| 27     | (3S)Galb1-4(6S)Glc-Sp8                      | 8         | 6     | 78   | 23         | 12    | 53   | 54         | 19    | 36   |
| 38     | (3S)Galb-Sp8                                | 6         | 6     | 110  | 11         | 2     | 18   | 26         | 17    | 65   |
| 29     | (3S)Galb1-3GalNAca-Sp8                      | 6         | 5     | 91   | 17         | 4     | 26   | 16         | 10    | 64   |
| 513    | (3S)GalNAcb1-4(3S)GlcNAc-Sp8                | 4         | 3     | 81   | 3          | 6     | 191  | 13         | 10    | 71   |
| 492    | (3S)Galb1-3(Fuca1-4)GlcNAcb-Sp0             | 10        | 5     | 46   | 4          | 2     | 55   | 8          | 2     | 29   |
| 28     | (3S)Galb1-3(Fuca1-4)GlcNAcb-Sp8             | 6         | 4     | 68   | 7          | 10    | 136  | 7          | 3     | 48   |
| 31     | (3S)Galb1-3GlcNAcb-Sp8                      | 11        | 10    | 92   | 20         | 10    | 47   | 7          | 7     | 111  |
| 84     | (3S)Galb1-4(Fuca1-3)Glc-Sp0                 | 7         | 10    | 141  | -1         | 4     | -582 | 6          | 4     | 63   |
| 32     | (3S)Galb1-4(Fuca1-3)GlcNAc-Sp0              | 2         | 3     | 152  | 10         | 6     | 65   | 5          | 6     | 109  |
| 24     | (3S)Galb1-4(Fuca1-3)(6S)Glc-Sp0             | 12        | 7     | 62   | 2          | 2     | 97   | 4          | 4     | 100  |
| 569    | (3S)GlcAb1-3Galb1-4GlcNAcb1-3Galb1-4Glc-Sp0 | 0         | 2     | 349  | 5          | 14    | 263  | 4          | 6     | 147  |
| 23     | 6S(3S)Galb1-4GlcNAcb-Sp0                    | 6         | 6     | 98   | 12         | 5     | 38   | 3          | 3     | 93   |
| 33     | (3S)Galb1-4(Fuca1-3)GlcNAc-Sp8              | 15        | 8     | 58   | 11         | 4     | 36   | 3          | 5     | 157  |
| 570    | (3S)GlcAb1-3Galb1-4GlcNAcb1-2Mana-Sp0       | 16        | 4     | 24   | 6          | 2     | 42   | 3          | 5     | 159  |
| 504    | (3S)GalNAcb1-4(Fuca1-3)GlcNAcb-Sp8          | 4         | 1     | 28   | 5          | 6     | 122  | 3          | 3     | 126  |
| 30     | (3S)Galb1-3GlcNAcb-Sp0                      | 12        | 7     | 59   | 3          | 1     | 44   | 2          | 4     | 228  |
| 296    | 4S(3S)Galb1-4GlcNAcb-Sp0                    | 4         | 5     | 119  | 5          | 3     | 51   | 2          | 3     | 156  |
| 40     | (4S)Galb1-4GlcNAcb-Sp8                      | 2         | 7     | 314  | 6          | 6     | 87   | 4          | 5     | 109  |
| 512    | (6S)GalNAcb1-4GlcNAc-Sp8                    | 5         | 3     | 61   | 5          | 7     | 145  | 1          | 4     | 380  |
| 443    | (6S)Galb1-3GlcNAcb-Sp0                      | -1        | 3     | -407 | 12         | 21    | 177  | -2         | 2     | -132 |
| 39     | (6S)(4S)Galb1-4GlcNAcb-Sp0                  | 6         | 8     | 141  | 20         | 7     | 36   | 22         | 26    | 120  |
| 355    | (6S)GlcNAcb1-3Galb1-4GlcNAcb-Sp0            | 16        | 13    | 84   | 11         | 3     | 28   | 11         | 4     | 38   |
| 444    | (6S)Galb1-3(6S)GlcNAc-Sp0                   | 5         | 3     | 49   | 17         | 20    | 122  | 11         | 2     | 22   |
| 518    | (6P)Galb1-4GlcNAcb-Sp0                      | -1        | 2     | -356 | -1         | 2     | -174 | 3          | 6     | 165  |
| 517    | Galb1-4(6P)GlcNAcb-Sp0                      | 17        | 14    | 82   | 9          | 7     | 70   | 13         | 8     | 64   |
| 155    | Galb1-4(6S)Glc-Sp0                          | 6         | 3     | 55   | 6          | 3     | 53   | 11         | 10    | 90   |
| 41     | (6P)Mana-Sp8                                | 4         | 7     | 174  | 6          | 1     | 8    | 10         | 9     | 90   |
| 251    | Neu5Aca2-3Galb1-4(6S)GlcNAcb-Sp8            | 9         | 3     | 31   | 3          | 4     | 122  | 9          | 12    | 131  |
| 298    | (6P)Glc-Sp10                                | 6         | 6     | 113  | 4          | 4     | 90   | 8          | 3     | 34   |
| 516    | (4S)GalNAcb-Sp10                            | 9         | 5     | 49   | 8          | 9     | 110  | 8          | 3     | 41   |
| 222    | Fuca1-2(6S)Galb1-4(6S)Glc-Sp0               | 10        | 8     | 79   | 2          | 3     | 136  | 8          | 4     | 47   |
| 221    | Fuca1-2Galb1-4(6S)GlcNAcb-Sp8               | 6         | 6     | 97   | 6          | 3     | 47   | 8          | 6     | 80   |
| 290    | Galb1-4(Fuca1-3)(6S)GlcNAcb-Sp0             | 9         | 4     | 41   | 4          | 6     | 156  | 8          | 1     | 11   |
| 242    | Neu5Aca2-3Galb1-3(6S)GalNAca-Sp8            | 7         | 8     | 116  | 15         | 7     | 44   | 7          | 7     | 100  |
| 45     | (6S)Galb1-4(6S)Glc-Sp8                      | 4         | 5     | 128  | 4          | 6     | 146  | 7          | 4     | 54   |
| 267    | Neu5Aca2-6Galb1-4(6S)GlcNAcb-Sp8            | 6         | 3     | 58   | 3          | 3     | 118  | 7          | 2     | 30   |
| 220    | Fuca1-2(6S)Galb1-4GlcNAcb-Sp0               | 6         | 4     | 66   | -3         | 6     | -195 | 6          | 2     | 33   |
| 230    | Neu5Aca2-3(6S)Galb1-4(Fuca1-3)GlcNAcb-Sp8   | -1        | 2     | -122 | -2         | 5     | -298 | 6          | 7     | 111  |
| 262    | Fuca1-2Galb1-4(6S)Glc-Sp0                   | 6         | 6     | 96   | -2         | 3     | -168 | 6          | 7     | 122  |
| 501    | Fuca1-2(6S)Galb1-3(6S)GlcNAcb-Sp0           | 1         | 3     | 287  | 1          | 10    | 730  | 6          | 4     | 72   |
| 46     | Neu5Aca2-3(6S)Galb1-4GlcNAcb-Sp8            | 2         | 3     | 115  | 2          | 9     | 382  | 5          | 3     | 66   |
| 510    | Galb1-3(6S)GlcNAcb-Sp8                      | 4         | 1     | 27   | -1         | 1     | -191 | 5          | 8     | 176  |
| 497    | Fuca1-2(6S)Galb1-3GlcNAcb-Sp0               | 4         | 7     | 179  | 10         | 16    | 162  | 5          | 8     | 172  |
| 252    | Neu5Aca2-3Galb1-4(Fuca1-3)(6S)GlcNAcb-Sp8   | 6         | 2     | 31   | 5          | 7     | 126  | 4          | 2     | 43   |
| 47     | (6S)GlcNAcb-Sp8                             | 6         | 4     | 69   | 6          | 6     | 105  | 4          | 4     | 102  |
| 514    | GalNAcb1-4(6S)GlcNAc-Sp8                    | 6         | 5     | 77   | 7          | 9     | 129  | 4          | 7     | 207  |
| 502    | Neu5Aca2-6GalNAcb1-4(6S)GlcNAcb-Sp8         | 3         | 2     | 77   | 8          | 2     | 19   | 3          | 3     | 92   |
| 511    | (6S)(4S)GalNAcb1-4GlcNAc-Sp8                | 6         | 3     | 52   | 6          | 5     | 96   | 3          | 2     | 90   |
| 238    | Neu5Aca2-3Galb1-3(6S)GlcNAc-Sp8             | 7         | 12    | 175  | 12         | 7     | 54   | 3          | 8     | 304  |
| 156    | Galb1-4(6S)Glc-Sp8                          | 11        | 4     | 36   | 7          | 9     | 135  | 2          | 5     | 237  |
| 291    | Galb1-4(Fuca1-3)(6S)Glc-Sp0                 | 7         | 6     | 82   | 6          | 6     | 107  | 2          | 8     | 463  |
| 42     | (6S)Galb1-4Glc-Sp0                          | 6         | 3     | 43   | -6         | 1     | -15  | 0          | 1     | 232  |
| 43     | (6S)Galb1-4Glc-Sp8                          | 5         | 5     | 87   | 5          | 3     | 64   | 0          | 2     | 610  |
| 248    | Fuca1-2(6S)Galb1-4Glc-Sp0                   | 6         | 6     | 110  | -3         | 1     | -42  | -1         | 1     | -101 |
| 503    | GalNAcb1-4(Fuca1-3)(6S)GlcNAcb-Sp8          | 7         | 5     | 68   | 2          | 2     | 145  | -1         | 4     | -275 |
| 500    | Fuca1-2Galb1-3(6S)GlcNAcb-Sp0               | -5        | 1     | -21  | 5          | 10    | 213  | -3         | 4     | -136 |

**Supplementary Table S2.** Compilation of O6 positive staining and expression of the sulfotransferases (GAL3ST-2 and GAL3ST-3) from the human proteome atlas. Immunohistological screening was done on multiple organs and tissues as described in materials and methods. Positive staining is denoted as +, and increase in staining after neuraminidase treatment as +\*. Columns GAL3ST2 and GAL3ST3 reflect expression data from the Human Protein Atlas.

| Tissue                          | O6 | GAL3ST2 | GAL3ST3 |
|---------------------------------|----|---------|---------|
| Adrenal Gland                   | -  | -       | -       |
| Bladder                         | -  | -       | -       |
| Bones                           | -  | N/A     | N/A     |
| Brain - Cerebellum              | +  | N/A     | N/A     |
| Brain - Cerebral Cortex         | -  | -       | +       |
| Brain - Pituitary               | +* | N/A     | N/A     |
| Eye                             | +  | N/A     | N/A     |
| Female tissues - Fallopian Tube | +  | +       | +       |
| Female tissues - Ovary          | -  | -       | -       |
| Female tissues - Cervix         | -  | -       | -       |
| Female tissues - Endometrium    | +* | -       | +       |
| Female tissues - Placenta       | -  | -       | -       |
| G.I. - Esophagus                | +* | -       | -       |
| G.I. - Stomach                  | -  | -       | -       |
| G.I. - Small Intestine          | -  | -       | -       |
| G.I. - Colon                    | +  | +       | -       |
| G.I. - Rectum                   | +  | +       | -       |
| Heart                           | -  | -       | +       |
| Kidney                          | +* | -       | +       |
| Liver                           | -  | -       | -       |
| Lung                            | -  | -       | -       |
| Male tissues - Prostate         | +* | -       | +       |
| Male tissues - Testis           | -  | -       | +       |
| Pancreas                        | -  | -       | -       |
| Skin                            | -  | -       | -       |
| Spinal Cord                     | -  | N/A     | N/A     |
| Spleen                          | -  | -       | -       |
| Striated muscle                 | -  | -       | -       |
| Thymus                          | -  | N/A     | N/A     |
| Thyroid                         | +  | -       | +       |
| Tonsil                          | -  | -       | -       |

**Supplementary Table S3.** Data collection and refinement statistics.

|                                     | <u>O6 (Apo)</u>         | <u>O6 3-HSO3-LacNAc</u> |
|-------------------------------------|-------------------------|-------------------------|
| <b>Data collection</b>              |                         |                         |
| Space group                         | C2                      | I4                      |
| Cell dimensions                     |                         |                         |
| <i>a</i> , <i>b</i> , <i>c</i> (Å)  | 52.3, 38.1, 78.6        | 107.3 107.3 63.2        |
| $\alpha$ , $\beta$ , $\gamma$ (°)   | 90, 103.9, 90           | 90, 90, 90              |
| Resolution (Å)                      | 28.0-1.55 (1.61-1.55) * | 38.2 – 1.90 (2.01-1.90) |
| No. unique reflections              | 21990                   | 28496                   |
| $R_{\text{sym}}$                    | 9.9 (81.5)              | 11.4 (167.3)            |
| $R_{\text{pim}}$                    | 4.4 (50.1)              | 4.8 (85.5)              |
| $CC_{1/2}$                          | 89.4 (53.3)             | 99.8 (55.9)             |
| <i>I</i> / $\sigma I$               | 12.7 (1.2)              | 13.3 (1.2)              |
| Completeness (%)                    | 99.6 (96.2)             | 99.9 (99.8)             |
| Redundancy                          | 5.7 (3.2)               | 6.8 (6.7)               |
| <b>Refinement</b>                   |                         |                         |
| Resolution (Å)                      | 1.55                    | 1.9                     |
| No. reflections                     | 21,895                  | 28,485                  |
| $R_{\text{work}} / R_{\text{free}}$ | 15.9 / 20.1             | 18.4 / 22.9             |
| No. atoms                           |                         |                         |
| Protein                             | 1370                    | 2590                    |
| Ions                                | 10                      |                         |
| Ligand                              |                         | 60                      |
| Water                               | 139                     | 199                     |
| <i>B</i> -values (Å <sup>2</sup> )  |                         |                         |
| Protein                             | 20                      | 33                      |
| Ion                                 | 22                      |                         |
| Ligand                              |                         | 22                      |
| Water                               | 31                      | 46                      |
| Wilson B-value                      | 11                      | 36                      |
| R.m.s. deviations                   |                         |                         |
| Bond lengths (Å)                    | 0.016                   | 0.015                   |
| Bond angles (°)                     | 1.36                    | 1.40                    |
| Ramachandran (%)                    |                         |                         |
| Allowed                             | 100                     | 100                     |
| Outliers                            | 0                       | 0                       |

\*Values in parentheses are for highest-resolution shell.

<sup>a</sup>  $R_{\text{sym}} = \sum_{hkl} \sum_i |I_{hkl,i} - \langle I_{hkl} \rangle| / \sum_{hkl} \sum_i I_{hkl,i}$  and  $R_{\text{pim}} = \sum_{hkl} (1/(n-1))^{1/2} \sum_i |I_{hkl,i} - \langle I_{hkl} \rangle| / \sum_{hkl} \sum_i I_{hkl,i}$ , where  $I_{hkl,i}$  is the scaled intensity of the *i*<sup>th</sup> measurement of reflection *h*, *k*, *l*,  $\langle I_{hkl} \rangle$  is the average intensity for that reflection, and *n* is the redundancy.

<sup>b</sup>  $CC_{1/2}$  = Pearson correlation coefficient between two random half datasets.

<sup>c</sup>  $R_{\text{work}} = \sum_{hkl} |F_o - F_c| / \sum_{hkl} |F_o| \times 100$ , where  $F_o$  and  $F_c$  are the observed and calculated structure factors,  $R_{\text{free}}$  was calculated as for  $R_{\text{work}}$ , but on a test set comprising 5% of the data excluded from refinement.

<sup>d</sup> Calculated with MolProbity <sup>70</sup>.

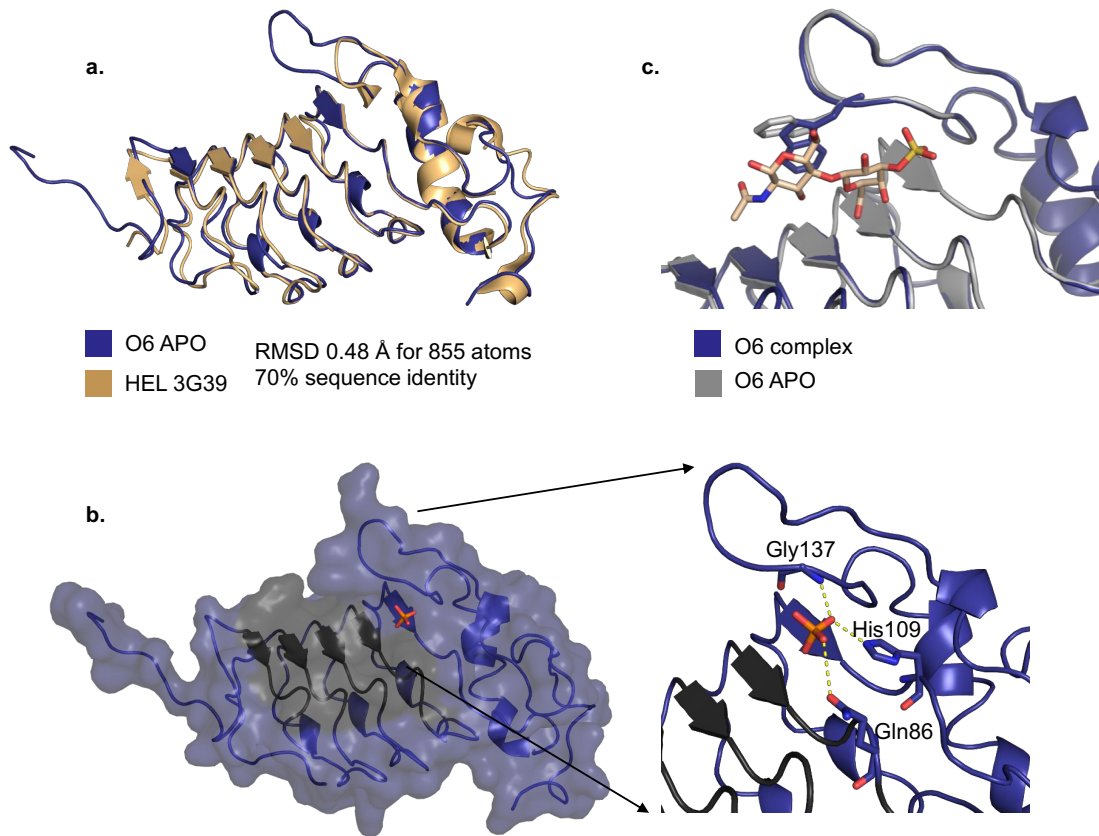

**Supplementary Figure S1. A.** Overlay of apo crystal structure of VLR O6 with VLR 3G39 that is specific for hen egg lysozyme (HEL). Crystal structures for both are quite similar despite their 70% sequence identity. **B.** Apo crystal structure of O6 shows a phosphate ion interacting with Gly136, His109 and Gln86, similar to the sulfate recognition site. **C.** Detailed overlay of the apo and ligand-bound crystal structures suggests that the binding site is preconfigured.

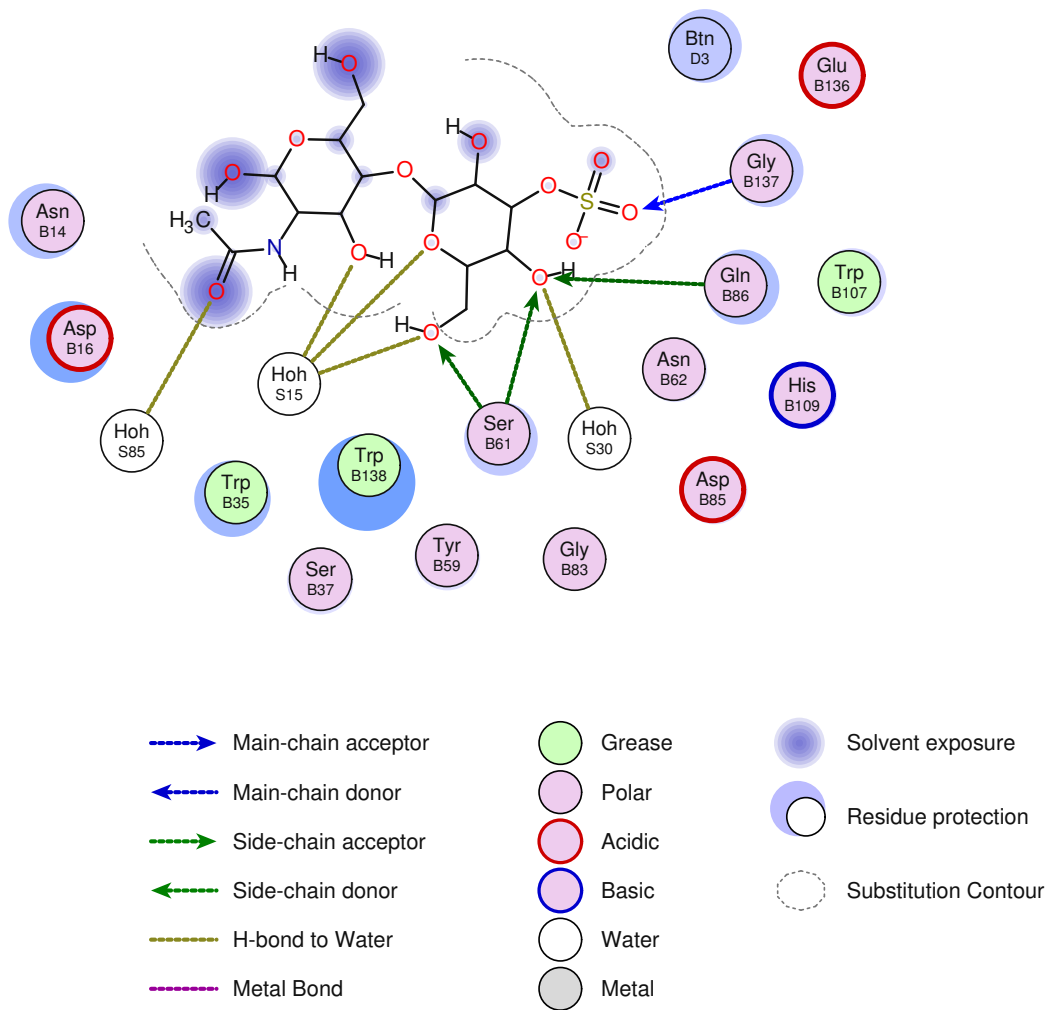

**Supplementary Figure S2.** Detailed view of the key interactions occurring between O6 and (3S)Gal $\beta$ 1-4GlcNAc ligand.

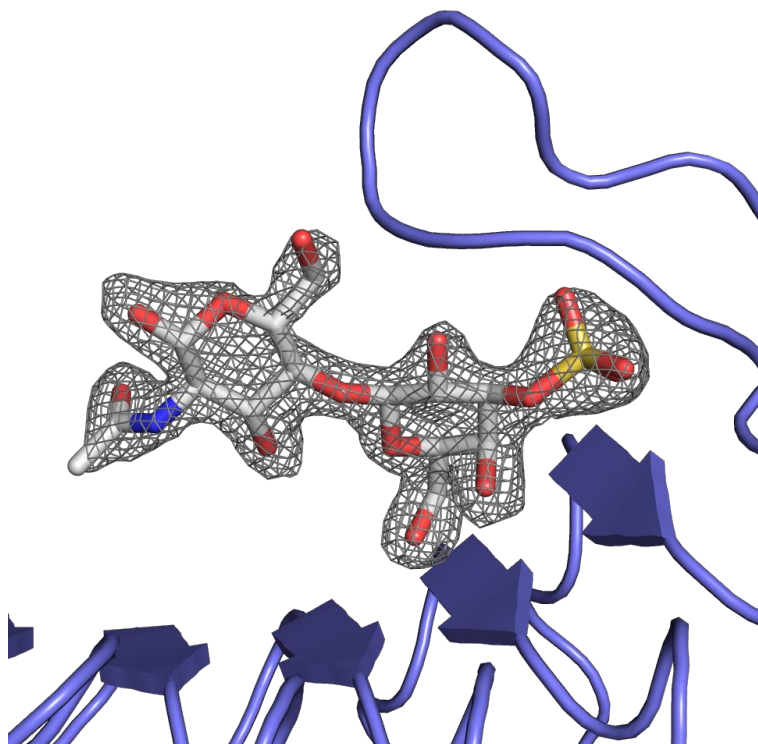

**Supplementary Figure S3.** Electron density OMIT map of the (3S)Gal $\beta$ 1-4GlcNAc ligand. The 2FO-FC simulated annealing omit map at 1.5 sigma shows clear electron density for all features of the ligand.

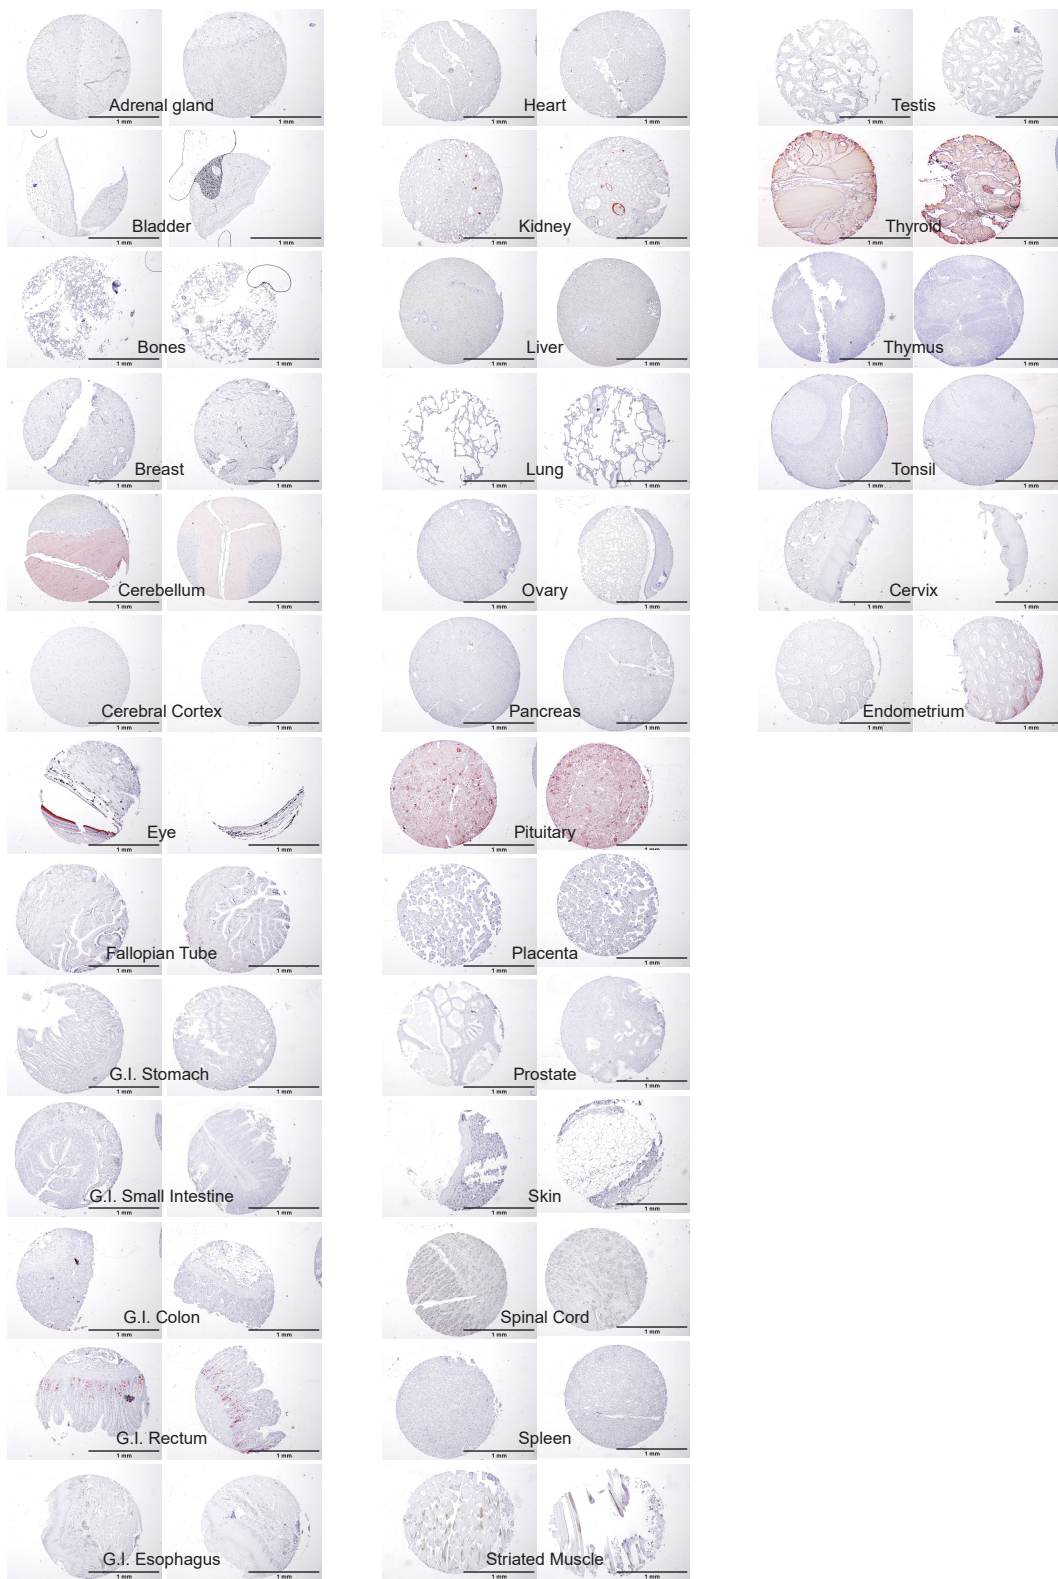

**Supplementary Figure S4.** IHC staining profiles of the all tissues on the human tissue macroarray.

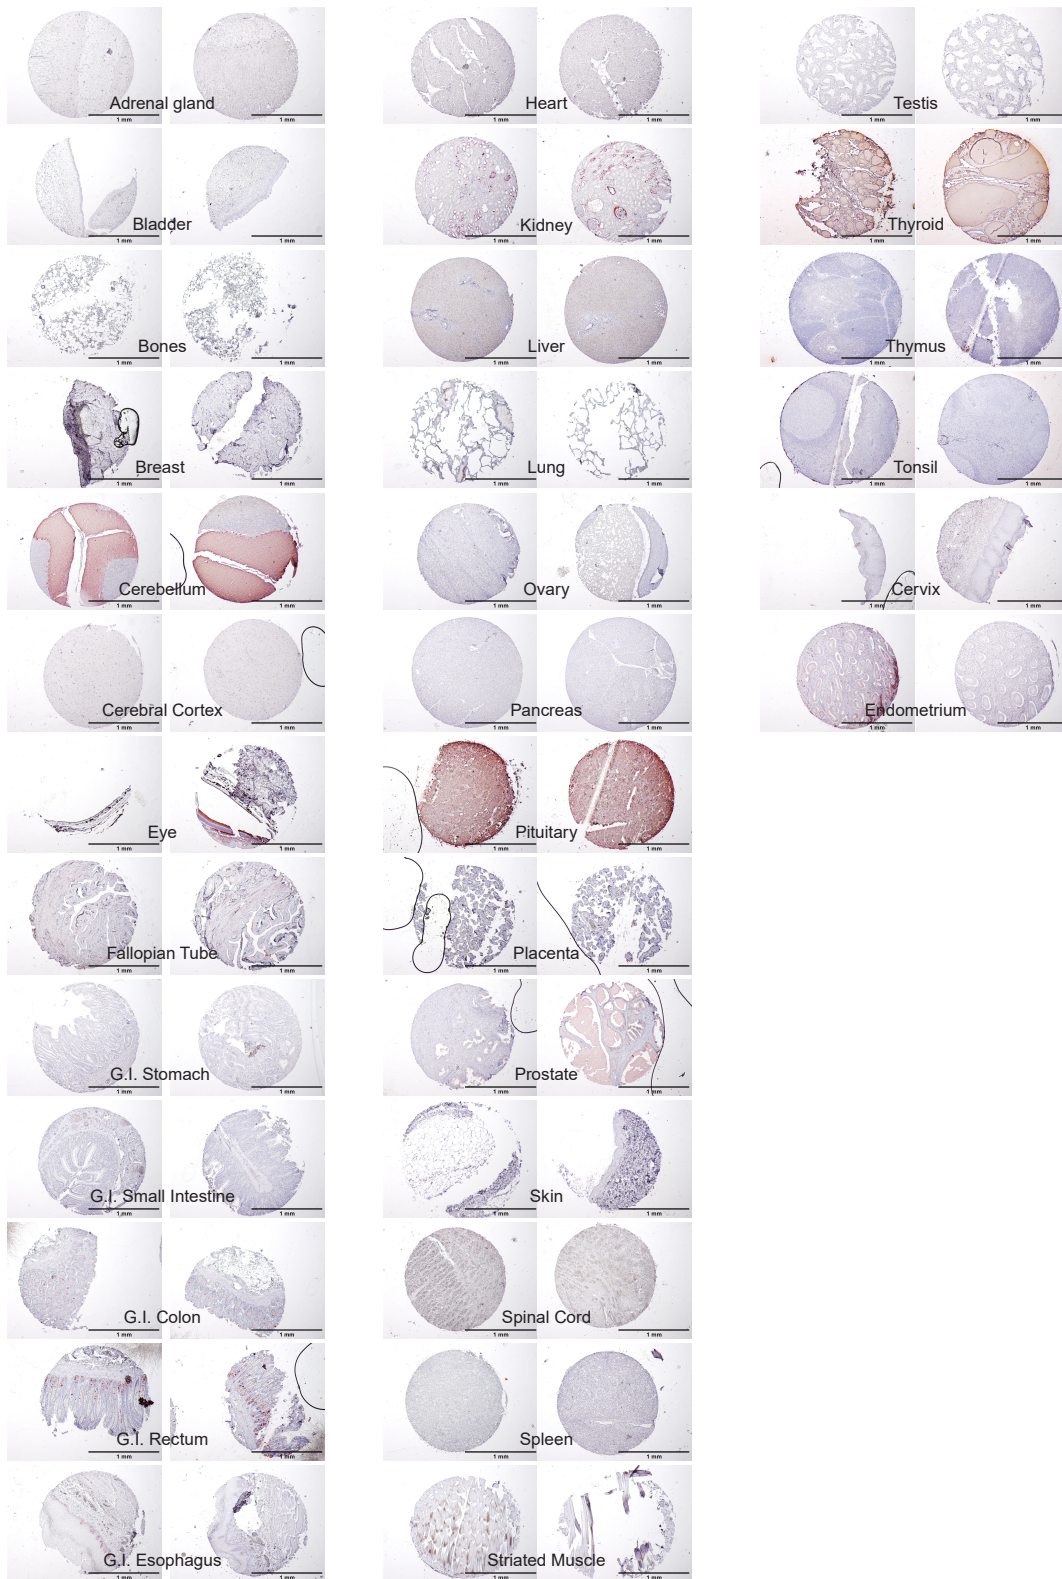

**Supplementary Figure S5.** IHC staining profiles of the all tissues on the human tissue macroarray after neuraminidase treatment.



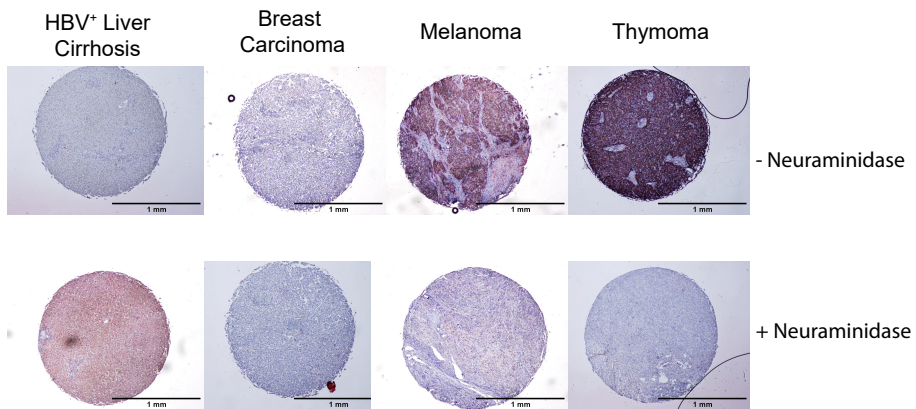

**Supplementary Figure S6.** IHC staining profiles of the diseased and cancerous tissues on the human tissue macroarray before and after neuraminidase treatment.

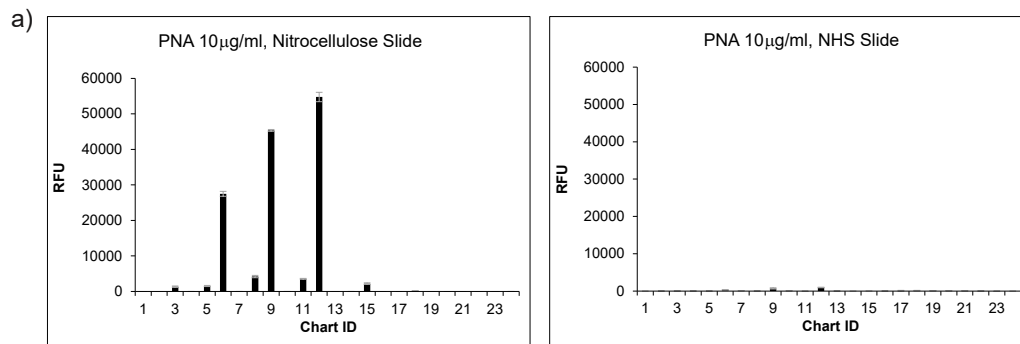

b) Nitrocellulose

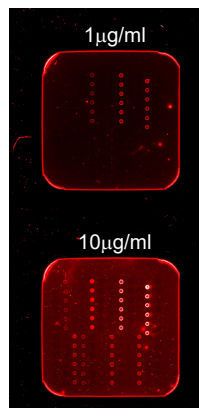

c) NHS

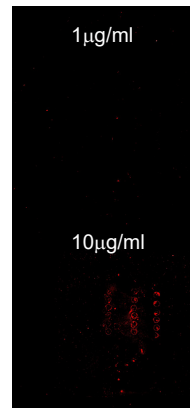

d)

| Chart ID | Glycoprotein                       | Print Concentration (µg/ml) | Average RFU | STDEV | %CV  | Average SNR |
|----------|------------------------------------|-----------------------------|-------------|-------|------|-------------|
| 1        | Bovine Submaxillary Mucin          | 1                           | -88         | 34    | -39  | -0.351      |
| 2        | Bovine Submaxillary Mucin          | 10                          | -73         | 26    | -35  | -0.277      |
| 3        | Bovine Submaxillary Mucin          | 100                         | 1323        | 205   | 15   | 3.105       |
| 4        | Porcine Stomach Mucin, Type II     | 1                           | -27         | 30    | -113 | -0.123      |
| 5        | Porcine Stomach Mucin, Type II     | 10                          | 1526        | 152   | 10   | 2.952       |
| 6        | Porcine Stomach Mucin, Type II     | 100                         | 27475       | 710   | 3    | 60.748      |
| 7        | Porcine Stomach Mucin, Type III    | 1                           | -22         | 11    | -51  | -0.099      |
| 8        | Porcine Stomach Mucin, Type III    | 10                          | 4207        | 321   | 8    | 10.503      |
| 9        | Porcine Stomach Mucin, Type III    | 100                         | 45335       | 244   | 1    | 92.752      |
| 10       | Glycophorin A                      | 1                           | -40         | 34    | -85  | -0.217      |
| 11       | Glycophorin A                      | 10                          | 3541        | 126   | 4    | 9.538       |
| 12       | Glycophorin A                      | 100                         | 54753       | 1338  | 2    | 48.657      |
| 13       | Normal Sputum Mucin (N1)           | 1                           | -82         | 39    | -48  | -0.373      |
| 14       | Normal Sputum Mucin (N1)           | 10                          | -14         | 18    | -128 | -0.111      |
| 15       | Normal Sputum Mucin (N1)           | 100                         | 2185        | 221   | 10   | 6.641       |
| 16       | Cystic Fibrosis Sputum Mucin (CF1) | 1                           | -125        | 24    | -20  | -0.326      |
| 17       | Cystic Fibrosis Sputum Mucin (CF1) | 10                          | -146        | 21    | -15  | -0.479      |
| 18       | Cystic Fibrosis Sputum Mucin (CF1) | 100                         | 208         | 13    | 6    | 0.228       |
| 19       | Bovine Serum Albumin (BSA)         | 1                           | -63         | 23    | -37  | -0.191      |
| 20       | Bovine Serum Albumin (BSA)         | 10                          | -137        | 21    | -15  | -0.356      |
| 21       | Bovine Serum Albumin (BSA)         | 100                         | -64         | 16    | -25  | -0.309      |

**Supplementary Figure S7.** Comparison of NHS vs. Nitrocellulose Slide for Mucin microarray Printing. **A.** Graphs showing the average RFU of 10µg/ml of PNA to the FAST nitrocellulose slide (left graph) vs. Schott NHS slide (right graph). Error bars represent the standard deviation.

Refer to panel d) for the identities of the chart ID numbers. **B.** Scanned microarray image of the 1 $\mu$ g/ml and 10 $\mu$ g/ml PNA binding to two separate subarrays on the nitrocellulose slide. Fluorescence is pseudo-colored red for contrast. White pixels indicate detector-saturated pixels. **C.** Scanned microarray image of the 1 $\mu$ g/ml and 10 $\mu$ g/ml PNA binding to two separate subarrays on the NHS slide. Fluorescence is pseudo-colored red for contrast. This image was scanned under similar PMT and laser power settings as the nitrocellulose slide, and the images are set to the same brightness and contrast settings. **D.** Table of the average RFU, standard deviation, %CV, and average SNR values for nitrocellulose mucin microarray screening with the 10 $\mu$ g/ml PNA. Mucins that were classified as “bound” (defined as an SNR  $\geq$  5.000) have the SNR value highlighted in green, while mucins that were classified as unbound (defined as an SNR  $<$  5.000) have the SNR value highlighted in red.

a)

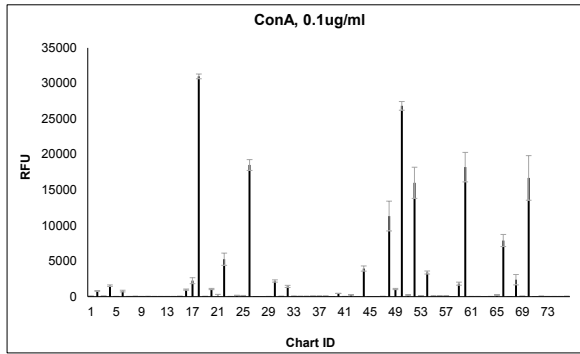

| Chart ID | Glycoprotein                        | Print Concentration (µg/ml) | Average RFU | STDEV | %CV | Average SNR |
|----------|-------------------------------------|-----------------------------|-------------|-------|-----|-------------|
| 17       | IgM                                 | 10                          | 2241        | 414   | 18  | 40.692      |
| 18       | IgM                                 | 100                         | 30985       | 329   | 1   | 515.510     |
| 19       | IgG, Human                          | 10                          | 39          | 18    | 47  | 0.219       |
| 20       | IgG, Human                          | 100                         | 1065        | 83    | 8   | 34.285      |
| 21       | IgG, Bovine                         | 10                          | 119         | 187   | 156 | 0.402       |
| 22       | IgG, Bovine                         | 100                         | 5264        | 863   | 16  | 6.766       |
| 25       | α2-Macroglobulin                    | 10                          | 109         | 58    | 53  | 0.909       |
| 26       | α2-Macroglobulin                    | 100                         | 18516       | 770   | 4   | 266.488     |
| 47       | Laminin                             | 10                          | 36          | 17    | 47  | 1.133       |
| 48       | Laminin                             | 100                         | 11333       | 2097  | 18  | 241.732     |
| 49       | Thyroglobulin, Human                | 10                          | 1068        | 88    | 8   | 15.615      |
| 50       | Thyroglobulin, Human                | 100                         | 26836       | 605   | 2   | 163.054     |
| 51       | Thyroglobulin, Bovine               | 10                          | 234         | 61    | 26  | 3.644       |
| 52       | Thyroglobulin, Bovine               | 100                         | 16003       | 2196  | 14  | 112.668     |
| 53       | Ovalbumin                           | 10                          | 95          | 22    | 23  | 0.686       |
| 54       | Ovalbumin                           | 100                         | 3396        | 213   | 6   | 65.669      |
| 55       | Ovalbumin, Periodate-Treated        | 10                          | 74          | 21    | 28  | 1.800       |
| 56       | Ovalbumin, Periodate-Treated        | 100                         | 81          | 34    | 41  | 1.925       |
| 59       | Invertase                           | 10                          | 1815        | 212   | 12  | 22.850      |
| 60       | Invertase                           | 100                         | 18215       | 2078  | 11  | 182.581     |
| 65       | <i>S. mansoni</i> Egg Antigen (SEA) | 10                          | 226         | 37    | 17  | 12.404      |
| 66       | <i>S. mansoni</i> Egg Antigen (SEA) | 100                         | 7890        | 854   | 11  | 379.906     |
| 67       | Haptoglobin                         | 10                          | 18          | 7     | 37  | 0.871       |
| 68       | Haptoglobin                         | 100                         | 2374        | 735   | 31  | 104.096     |
| 69       | slgA                                | 10                          | 61          | 17    | 28  | 2.862       |
| 70       | slgA                                | 100                         | 16705       | 3139  | 19  | 740.419     |

b)

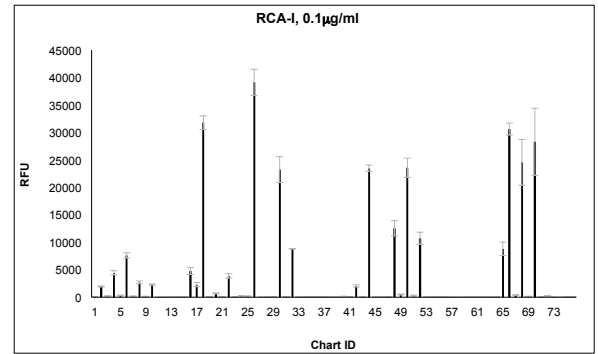

| Chart ID | Glycoprotein                        | Print Concentration (µg/ml) | Average RFU | STDEV | %CV | Average SNR |
|----------|-------------------------------------|-----------------------------|-------------|-------|-----|-------------|
| 3        | Porcine Stomach Mucin, Type III     | 10                          | 213         | 45    | 21  | 14.016      |
| 4        | Porcine Stomach Mucin, Type III     | 100                         | 4429        | 364   | 8   | 271.508     |
| 5        | Normal Human Sputum Mucin           | 10                          | 303         | 79    | 26  | 20.330      |
| 6        | Normal Human Sputum Mucin           | 100                         | 7600        | 463   | 6   | 417.756     |
| 7        | Human Cystic Fibrosis Sputum Mucin  | 10                          | 155         | 89    | 58  | 9.476       |
| 8        | Human Cystic Fibrosis Sputum Mucin  | 100                         | 2680        | 239   | 9   | 143.007     |
| 15       | IgA                                 | 10                          | 92          | 16    | 17  | 5.936       |
| 16       | IgA                                 | 100                         | 4753        | 632   | 13  | 266.332     |
| 17       | IgM                                 | 10                          | 2271        | 386   | 17  | 108.878     |
| 18       | IgM                                 | 100                         | 31756       | 1261  | 4   | 548.420     |
| 21       | IgG, Bovine                         | 10                          | 7           | 7     | 96  | 0.302       |
| 22       | IgG, Bovine                         | 100                         | 3858        | 386   | 10  | 250.727     |
| 23       | apo-Transferrin                     | 10                          | 1           | 3     | 294 | 0.021       |
| 24       | apo-Transferrin                     | 100                         | 250         | 21    | 8   | 16.593      |
| 25       | α2-Macroglobulin                    | 10                          | 145         | 80    | 55  | 5.600       |
| 26       | α2-Macroglobulin                    | 100                         | 39096       | 2378  | 6   | 1640.771    |
| 31       | Fibronectin                         | 10                          | 104         | 35    | 34  | 5.242       |
| 32       | Fibronectin                         | 100                         | 8824        | 48    | 1   | 542.038     |
| 41       | Asialofetuin                        | 10                          | 12          | 7     | 61  | 0.747       |
| 42       | Asialofetuin                        | 100                         | 2050        | 187   | 9   | 126.689     |
| 47       | Laminin                             | 10                          | 25          | 6     | 23  | 1.365       |
| 48       | Laminin                             | 100                         | 12518       | 1379  | 11  | 669.085     |
| 49       | Thyroglobulin, Human                | 10                          | 492         | 94    | 19  | 23.159      |
| 50       | Thyroglobulin, Human                | 100                         | 23564       | 1776  | 8   | 1033.701    |
| 51       | Thyroglobulin, Bovine               | 10                          | 274         | 88    | 32  | 13.958      |
| 52       | Thyroglobulin, Bovine               | 100                         | 10750       | 1112  | 10  | 372.248     |
| 65       | <i>S. mansoni</i> Egg Antigen (SEA) | 10                          | 8816        | 1217  | 14  | 529.292     |
| 66       | <i>S. mansoni</i> Egg Antigen (SEA) | 100                         | 30616       | 1113  | 4   | 1023.914    |
| 67       | Haptoglobin                         | 10                          | 409         | 74    | 18  | 18.213      |
| 68       | Haptoglobin                         | 100                         | 24513       | 4167  | 17  | 717.111     |
| 69       | slgA                                | 10                          | 154         | 26    | 17  | 7.585       |
| 70       | slgA                                | 100                         | 28279       | 6117  | 22  | 1133.749    |

**Supplementary Figure S8.** Graphs and a tabular list of glycoproteins specifically recognized by **A) ConA** and **B) RCA-I** are shown. Graphs show the average RFU of binding, and error bars represent the standard deviation. The tables for ConA and RCA-I are shown below the corresponding graphs. Note that each set of two chart IDs represents the same glycoprotein at 10µg/ml and 100µg/ml. Glycoproteins that were classified as “bound” (defined as an SNR ≥ 5.000) have the SNR value highlighted in green in the tables, while mucins that were classified as unbound (defined as an SNR < 5.000) have the SNR value highlighted in red in the tables.

a)

| ChartID | PrintDetail                          | PrintConc | PrintID | FAST Slide  |       | NOVA Slide  |       | FAST Slide |             | NOVA Slide  |         | FAST Slide |             | NOVA Slide |  |
|---------|--------------------------------------|-----------|---------|-------------|-------|-------------|-------|------------|-------------|-------------|---------|------------|-------------|------------|--|
|         |                                      |           |         | Average RFU | STDEV | Average RFU | STDEV | %CV        | Average SNR | Average RFU | STDEV   | %CV        | Average SNR |            |  |
| 1       | Bovine Submaxillary Mucin (BSM)      | 1ug/ml    | S-001   | -101        | -5    | 8           | 9     | -8         | -171        | -0.432      | -0.071  |            |             |            |  |
| 2       | Bovine Submaxillary Mucin (BSM)      | 10ug/ml   | S-002   | -101        | -2    | 19          | 16    | -18        | -723        | -0.463      | -0.003  |            |             |            |  |
| 3       | Bovine Submaxillary Mucin (BSM)      | 100ug/ml  | S-003   | 11          | 229   | 23          | 31    | 206        | 13          | 0.063       | 1.652   |            |             |            |  |
| 4       | Porcine Gastric Mucin Type III (PGM) | 1ug/ml    | S-004   | -100        | -3    | 13          | 9     | -13        | -316        | -0.529      | -0.043  |            |             |            |  |
| 5       | Porcine Gastric Mucin Type III (PGM) | 10ug/ml   | S-005   | -75         | -4    | 32          | 12    | -43        | -332        | -0.347      | -0.083  |            |             |            |  |
| 6       | Porcine Gastric Mucin Type III (PGM) | 100ug/ml  | S-006   | -130        | 22    | 17          | 28    | -13        | 125         | -0.560      | -0.015  |            |             |            |  |
| 7       | Human Normal Sputum Mucin            | 1ug/ml    | S-007   | 332         | 570   | 186         | 207   | 56         | 36          | 1.381       | 2.056   |            |             |            |  |
| 8       | Human Normal Sputum Mucin            | 10ug/ml   | S-008   | 14626       | 10408 | 1112        | 717   | 8          | 7           | 64.694      | 47.984  |            |             |            |  |
| 9       | Human Normal Sputum Mucin            | 100ug/ml  | S-009   | 43172       | 36702 | 1447        | 2364  | 3          | 6           | 38.860      | 205.783 |            |             |            |  |
| 10      | Human Cystic Fibrosis Sputum Mucin   | 1ug/ml    | S-010   | -85         | 16    | 27          | 16    | -32        | 98          | -0.349      | -0.013  |            |             |            |  |
| 11      | Human Cystic Fibrosis Sputum Mucin   | 10ug/ml   | S-011   | 2596        | 2039  | 295         | 355   | 11         | 17          | 10.990      | 4.167   |            |             |            |  |
| 12      | Human Cystic Fibrosis Sputum Mucin   | 100ug/ml  | S-012   | 11476       | 8974  | 709         | 551   | 6          | 6           | 14.803      | 24.045  |            |             |            |  |
| 13      | Bovine Serum Albumin (BSA)           | 1ug/ml    | S-013   | -128        | 21    | 13          | 67    | -10        | 323         | -0.496      | -0.040  |            |             |            |  |
| 14      | Bovine Serum Albumin (BSA)           | 10ug/ml   | S-014   | -117        | 6     | 25          | 18    | -21        | 318         | -0.529      | -0.027  |            |             |            |  |
| 15      | Bovine Serum Albumin (BSA)           | 100ug/ml  | S-015   | 47          | 153   | 92          | 60    | 198        | 39          | 0.093       | 0.890   |            |             |            |  |
| 16      | Phosphate Buffer                     | n/a       | S-016   | -157        | -1    | 30          | 76    | -19        | -15186      | -0.620      | -0.157  |            |             |            |  |

b)

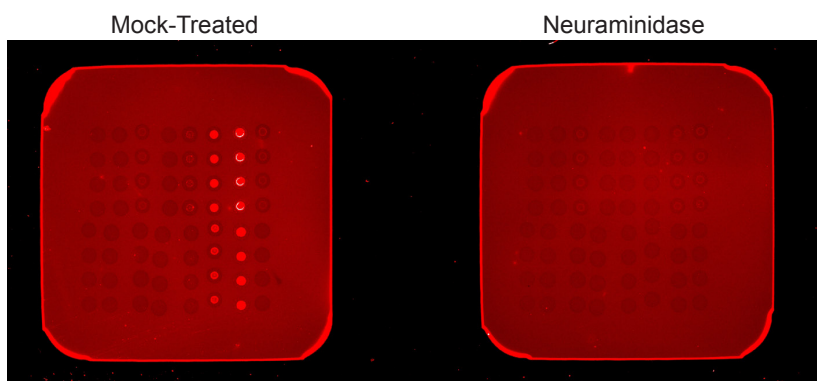

c)

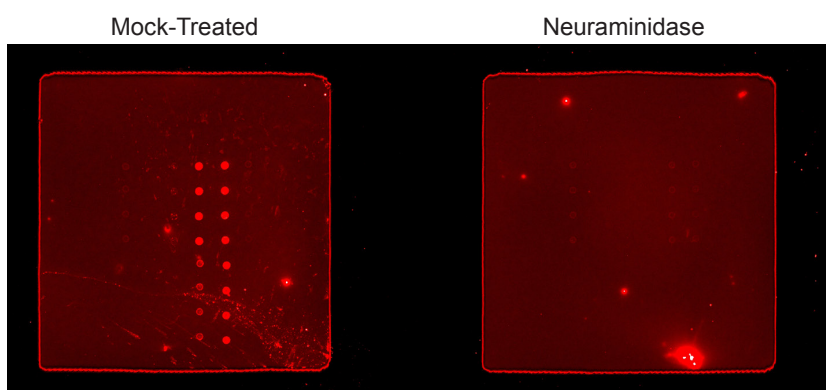

**Supplementary Figure S9.** Comparison of FAST vs. NOVA Nitrocellulose Slides for Mucin Microarray Printing. **A.** Side-by-side comparison of the average RFU, standard deviation (STDEV), %CV, and average SNR values for 0.5 $\mu$ g/ml CHO-131 screened on the FAST and NOVA nitrocellulose slide. The values shown represent the values measured from the mock-

treated subarrays shown in panels **B**) and **C**) of this figure. The higher values for the average RFU and average SNR and the lower value for the STDEV and %CV between the two slides are highlighted in green. Note that no biased trend is seen in the green coloring between the two slide types for the STDEV, %CV, or average SNR for glycoproteins bound (SNR  $\geq$  5.000) by CHO-131. **B**. Scanned microarray image of the 0.5 $\mu$ g/ml CHO-131 binding to the FAST nitrocellulose slide after mock treatment or treatment with neuraminidase. Fluorescence is pseudo-colored red for contrast purposes. **C**. Scanned microarray image of the 0.5 $\mu$ g/ml CHO-131 binding to the NOVA nitrocellulose slide after mock treatment or treatment with neuraminidase. Fluorescence is pseudo-colored red for contrast purposes. This image was scanned under similar PMT and laser power settings as the FAST slide, and the images are set to the same brightness and contrast settings.

a)

| ChartID | Glycoprotein                                                           | 1:1000 anti-H1 |           | 1:100 anti-H1 |           |
|---------|------------------------------------------------------------------------|----------------|-----------|---------------|-----------|
|         |                                                                        | SNR (Super G)  | SNR (BSA) | SNR (Super G) | SNR (BSA) |
| 2       | Bovine Submaxillary Mucin 100ug/ml                                     | 6.561          | 2.702     | 10.635        | 11.013    |
| 4       | Porcine Stomach Mucin, Type III 100ug/ml                               | 62.226         | 26.217    | 232.517       | 72.039    |
| 6       | Normal Human Sputum Mucin 100ug/ml                                     | 114.952        | 41.352    | 525.579       | 141.662   |
| 8       | Human Cystic Fibrosis Sputum Mucin 100ug/ml                            | 13.972         | 3.850     | 33.793        | 7.271     |
| 10      | Glycophorin, Human 100ug/ml                                            | 3.602          | 1.263     | 36.264        | 10.984    |
| 12      | alpha1-Acid Glycoprotein (Orosomucoid), from Human Serum 100ug/ml      | -0.269         | -0.322    | -0.243        | 0.028     |
| 14      | alpha1-Acid Glycoprotein (Orosomucoid), from Bovine Serum 100ug/ml     | -0.382         | 0.065     | 0.093         | -0.067    |
| 16      | IgA, from Human Serum 100ug/ml                                         | 50.320         | 5.474     | 23.698        | 7.391     |
| 18      | IgM, from Human Serum 100ug/ml                                         | 224.296        | 81.563    | 135.246       | 25.996    |
| 20      | IgG, from Human Serum 100ug/ml                                         | 133.949        | 18.326    | 95.963        | 26.360    |
| 22      | IgG, from Bovine Serum 100ug/ml                                        | 144.073        | 8.743     | 86.336        | 15.810    |
| 24      | apo-Transferrin, Human 100ug/ml                                        | 18.971         | 5.837     | 7.256         | 4.518     |
| 26      | a2-Macroglobulin, from Human Plasma 100ug/ml                           | 21.920         | 7.209     | 26.002        | 9.893     |
| 28      | alpha1-Antitrypsin, from Human Plasma 100ug/ml                         | 4.197          | 3.157     | 2.120         | 4.365     |
| 30      | Hemopexin, from Human Plasma 100ug/ml                                  | 5.404          | 7.332     | 3.197         | 4.986     |
| 32      | Fibronectin, from Human Plasma 100ug/ml                                | 84.691         | 3.183     | 585.623       | 113.608   |
| 34      | Bovine Serum Albumin (BSA) 100ug/ml                                    | 124.345        | 2.665     | 77.028        | 4.131     |
| 36      | Bovine Serum Albumin (BSA), Periodate-Treated 100ug/ml                 | 157.839        | 5.204     | 111.077       | 46.934    |
| 38      | alpha2-hs-Glycoprotein (Fetuin), Human 100ug/ml                        | 53.840         | -0.489    | 15.759        | 0.170     |
| 40      | Fetuin, from Fetal Calf Serum 100ug/ml                                 | 39.061         | 0.348     | 5.683         | 0.378     |
| 42      | Asialofetuin, from Fetal Calf Serum 100ug/ml                           | 29.591         | -0.076    | 4.623         | 1.327     |
| 44      | Lactoferrin, from Human Milk 100ug/ml                                  | 40.631         | 69.999    | 40.762        | 32.746    |
| 46      | Caseinoglycopeptide, from Bovine Casein 100ug/ml                       | 0.091          | -0.007    | -0.167        | 0.771     |
| 48      | Laminin, from Human Placenta 100ug/ml                                  | 70.550         | 13.312    | 41.193        | 11.172    |
| 50      | Thyroglobulin, Human 100ug/ml                                          | 10.151         | 5.070     | 105.827       | 32.164    |
| 52      | Thyroglobulin, from Bovine Thyroid 100ug/ml                            | 29.877         | 4.141     | 138.871       | 16.580    |
| 54      | Ovalbumin, from Chicken Egg White, Grade V 100ug/ml                    | 46.261         | 2.611     | 95.463        | 23.028    |
| 56      | Ovalbumin, from Chicken Egg White, Grade V, Periodate-Treated 100ug/ml | 33.830         | 1.905     | 69.448        | 15.096    |
| 58      | Trypsin Inhibitor (Ovomucoid), from Chicken Egg White 100ug/ml         | 1.628          | 0.428     | 0.579         | 0.173     |
| 60      | Invertase, from Saccharomyces cerevisiae, Grade VII 100ug/ml           | 0.320          | -0.181    | 0.421         | 0.393     |
| 62      | RNase B, from Bovine Pancreas 100ug/ml                                 | 0.044          | 0.195     | 0.410         | 0.191     |
| 64      | Horseradish Peroxidase (HRP) 100ug/ml                                  | -0.068         | -0.178    | -0.025        | 0.000     |
| 66      | Schistosoma mansoni Egg Antigen (SEA) 100ug/ml                         | 48.104         | 43.916    | 78.964        | 10.798    |
| 68      | Haptoglobin from Pooled Human Plasma 100ug/ml                          | 14.264         | 2.851     | 20.717        | 2.983     |
| 70      | slgA from Human Colostrum 100ug/ml                                     | 189.399        | 67.366    | 183.658       | 24.619    |
| 72      | Vitronectin, from Human Plasma 100ug/ml                                | 16.369         | 1.914     | 26.557        | 0.523     |

**Key:**

|                                                                                                                             |                                                                                    |
|-----------------------------------------------------------------------------------------------------------------------------|------------------------------------------------------------------------------------|
| <span style="background-color: #90EE90; border: 1px solid black; display: inline-block; width: 15px; height: 10px;"></span> | = expected binder based on previous demonstration of glycan determinant expression |
| <span style="background-color: #FFFF00; border: 1px solid black; display: inline-block; width: 15px; height: 10px;"></span> | = dose-dependent binder, but no previous evidence of glycan determinant expression |
| <span style="background-color: #FFB6C1; border: 1px solid black; display: inline-block; width: 15px; height: 10px;"></span> | = dose-independent binder or known off-target binder                               |
| <span style="background-color: #90EE90; border: 1px solid black; display: inline-block; width: 15px; height: 10px;"></span> | = higher SNR for an expected binder                                                |
| <span style="background-color: #90EE90; border: 1px solid black; display: inline-block; width: 15px; height: 10px;"></span> | = lower SNR for an expected binder                                                 |
| <span style="background-color: #FFB6C1; border: 1px solid black; display: inline-block; width: 15px; height: 10px;"></span> | = higher SNR for an off-target/dose-independent binder                             |
| <span style="background-color: #FFB6C1; border: 1px solid black; display: inline-block; width: 15px; height: 10px;"></span> | = lower SNR for an off-target/dose-independent binder                              |
| <span style="background-color: #FFFFFF; border: 1px solid black; display: inline-block; width: 15px; height: 10px;"></span> | = non-binder based on SNR < 5.000                                                  |

b)

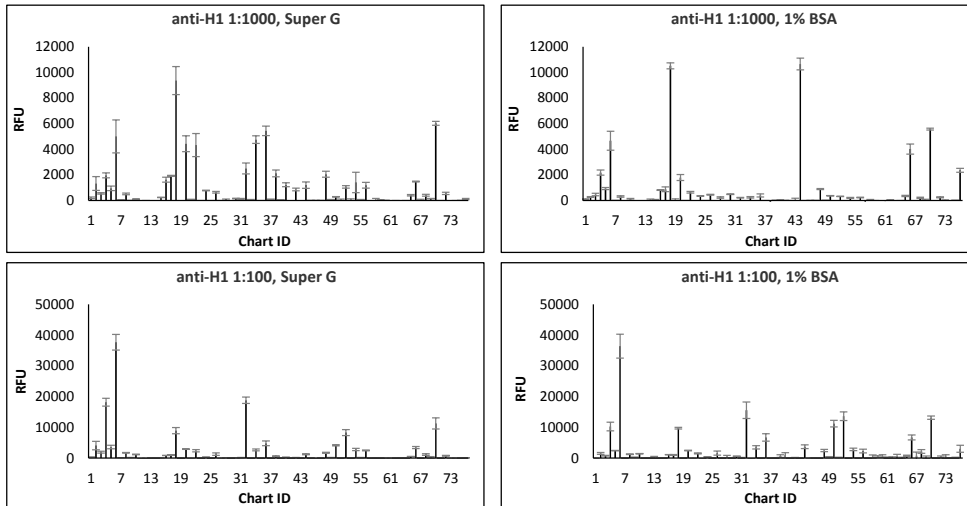

**Supplementary Figure S10.** Comparison of Super G vs. 1% BSA as Nitrocellulose Blocking Reagent. **A.** Comparison of SNRs for anti-H1 binding to the glycoprotein microarray v2 using Super G or 1% BSA as the blocking reagent. Only the 100 $\mu$ g/ml glycoproteins are shown in this figure. SNRs  $\geq 5.000$  are highlighted; the different highlight colors reflect whether the SNR is the higher or lower of two SNRs for Super G or 1% BSA as the blocking reagent as well as whether or not the glycoprotein itself was an expected binder/dose-dependent binder or an off-target binder/dose-independent binder. The SNRs for both the 1:1000 and 1:100 anti-H1 concentration screening are shown. **B.** Graphs showing the average RFU of 1:1000 (top graphs) and 1:100 (bottom graphs) anti-H1 binding to the glycoprotein microarray with Super G Blocking Buffer (left graphs) or 1% BSA (right graphs) used as the blocking reagent. Error bars represent the standard deviation.



a)

| 1µg/ml SNA |                                                                     | 0.1% BSA    | 10% BSA     |
|------------|---------------------------------------------------------------------|-------------|-------------|
| ChartID    | PrintDetail                                                         | Average SNR | Average SNR |
| 2          | Bovine Submaxillary Mucin_100ug/ml                                  | 19.299      | 17.093      |
| 4          | Porcine Stomach Mucin_Type III_100ug/ml                             | 48.428      | 65.435      |
| 6          | Normal Human Sputum Mucin_100ug/ml                                  | 87.831      | 165.233     |
| 8          | Human Cystic Fibrosis Sputum Mucin_100ug/ml                         | 32.441      | 15.793      |
| 10         | Glycophorin_Human_100ug/ml                                          | 0.090       | 1.406       |
| 12         | alpha1-Acid Glycoprotein (Orosomucoid)_from Human Serum_100ug/ml    | 1.194       | -0.031      |
| 14         | alpha1-Acid Glycoprotein (Orosomucoid)_from Bovine Serum_100ug/ml   | 2.190       | 0.160       |
| 16         | IgA_from Human Serum_100ug/ml                                       | 28.047      | 2.702       |
| 18         | IgM_from Human Serum_100ug/ml                                       | 72.612      | 36.108      |
| 20         | IgG_from Human Serum_100ug/ml                                       | 23.792      | 24.897      |
| 22         | IgG_from Bovine Serum_100ug/ml                                      | 76.933      | 27.643      |
| 24         | apo-Transferrin_Human_100ug/ml                                      | 138.164     | 1.264       |
| 26         | a2-Macroglobulin_from Human Plasma_100ug/ml                         | 311.407     | 14.475      |
| 28         | alpha1-Antitrypsin_from Human Plasma_100ug/ml                       | 34.355      | 0.161       |
| 30         | Hemopexin_from Human Plasma_100ug/ml                                | 114.529     | 0.451       |
| 32         | Fibronectin_from Human Plasma_100ug/ml                              | 99.452      | 195.025     |
| 34         | Bovine Serum Albumin (BSA)_100ug/ml                                 | 0.409       | 34.143      |
| 36         | Bovine Serum Albumin (BSA)_Periodate-Treated_100ug/ml               | 1.352       | 44.624      |
| 38         | alpha2-hs-Glycoprotein (Fetuin)_Human_100ug/ml                      | 3.070       | 3.232       |
| 40         | Fetuin_from Fetal Calf Serum_100ug/ml                               | 11.250      | 1.118       |
| 42         | Asialofetuin_from Fetal Calf Serum_100ug/ml                         | 1.248       | 0.585       |
| 44         | Lactoferrin_from Human Milk_100ug/ml                                | 115.233     | 16.080      |
| 46         | Caseinoglycopeptide_from Bovine Casein_100ug/ml                     | -0.335      | 0.107       |
| 48         | Laminin_from Human Placenta_100ug/ml                                | 30.657      | 14.606      |
| 50         | Thyroglobulin_Human_100ug/ml                                        | 135.356     | 36.257      |
| 52         | Thyroglobulin_from Bovine Thyroid_100ug/ml                          | 298.208     | 62.166      |
| 54         | Ovalbumin_from Chicken Egg White_Grade V_100ug/ml                   | -0.042      | 26.289      |
| 56         | Ovalbumin_from Chicken Egg White_Grade V_Periodate-Treated_100ug/ml | 3.501       | 23.761      |
| 58         | Trypsin Inhibitor (Ovomucoid)_from Chicken Egg White_100ug/ml       | 3.393       | -0.087      |
| 60         | Invertase_from Saccharomyces cerevisiae_Grade VII_100ug/ml          | 3.341       | 0.588       |
| 62         | RNase B_from Bovine Pancreas_100ug/ml                               | 0.118       | 0.150       |
| 64         | Horse radish Peroxidase (HRP)_100ug/ml                              | -0.652      | -0.098      |
| 66         | Schistosoma mansoni Egg Antigen (SEA)_100ug/ml                      | 73.085      | 27.938      |
| 68         | Haptoglobin from Pooled Human Plasma_100ug/ml                       | 140.840     | 12.036      |
| 70         | slgA from Human Colostrum_100ug/ml                                  | 267.813     | 37.068      |
| 72         | Vitronectin_from Human Plasma_100ug/ml                              | 6.490       | 0.314       |

Key:

|             |                                                                                    |
|-------------|------------------------------------------------------------------------------------|
| Green       | = expected binder based on previous demonstration of glycan determinant expression |
| Light Green | = dose-independent binder or known off-target binder                               |
| Yellow      | = dose-dependent binder but no prior evidence of glycan determinant expression     |
| Light Blue  | = binder (SNR ≥ 5.000)                                                             |
| Red         | = non-binder (SNR < 5.000)                                                         |

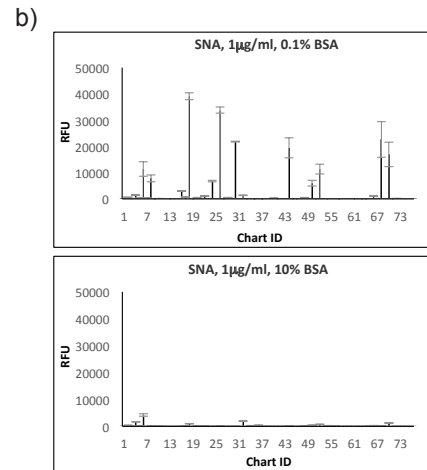

c)

| CHO-131 (1µg/ml) |                                                                     | 0.1% BSA    | 10% BSA     |
|------------------|---------------------------------------------------------------------|-------------|-------------|
| ChartID          | PrintDetail                                                         | Average SNR | Average SNR |
| 2                | Bovine Submaxillary Mucin_100ug/ml                                  | 18.039      | -0.158      |
| 4                | Porcine Stomach Mucin_Type III_100ug/ml                             | 0.088       | -0.360      |
| 6                | Normal Human Sputum Mucin_100ug/ml                                  | 82.866      | 56.993      |
| 8                | Human Cystic Fibrosis Sputum Mucin_100ug/ml                         | 24.536      | 37.005      |
| 10               | Glycophorin_Human_100ug/ml                                          | 17.621      | 0.652       |
| 12               | alpha1-Acid Glycoprotein (Orosomucoid)_from Human Serum_100ug/ml    | 0.322       | -0.183      |
| 14               | alpha1-Acid Glycoprotein (Orosomucoid)_from Bovine Serum_100ug/ml   | 0.197       | -0.174      |
| 16               | IgA_from Human Serum_100ug/ml                                       | 12.146      | 2.474       |
| 18               | IgM_from Human Serum_100ug/ml                                       | 10.239      | 45.977      |
| 20               | IgG_from Human Serum_100ug/ml                                       | 0.311       | -0.026      |
| 22               | IgG_from Bovine Serum_100ug/ml                                      | 5.119       | 0.412       |
| 24               | apo-Transferrin_Human_100ug/ml                                      | 38.357      | 0.241       |
| 26               | a2-Macroglobulin_from Human Plasma_100ug/ml                         | 70.070      | 0.679       |
| 28               | alpha1-Antitrypsin_from Human Plasma_100ug/ml                       | 5.543       | 0.026       |
| 30               | Hemopexin_from Human Plasma_100ug/ml                                | 60.319      | 0.233       |
| 32               | Fibronectin_from Human Plasma_100ug/ml                              | 144.247     | 0.112       |
| 34               | Bovine Serum Albumin (BSA)_100ug/ml                                 | 65.806      | 0.840       |
| 36               | Bovine Serum Albumin (BSA)_Periodate-Treated_100ug/ml               | 38.355      | 0.673       |
| 38               | alpha2-hs-Glycoprotein (Fetuin)_Human_100ug/ml                      | 2.451       | -0.075      |
| 40               | Fetuin_from Fetal Calf Serum_100ug/ml                               | 9.008       | 0.076       |
| 42               | Asialofetuin_from Fetal Calf Serum_100ug/ml                         | 2.289       | -0.174      |
| 44               | Lactoferrin_from Human Milk_100ug/ml                                | 40.046      | 2.715       |
| 46               | Caseinoglycopeptide_from Bovine Casein_100ug/ml                     | -0.156      | -0.236      |
| 48               | Laminin_from Human Placenta_100ug/ml                                | 26.735      | 0.053       |
| 50               | Thyroglobulin_Human_100ug/ml                                        | 110.864     | 0.314       |
| 52               | Thyroglobulin_from Bovine Thyroid_100ug/ml                          | 52.533      | 0.672       |
| 54               | Ovalbumin_from Chicken Egg White_Grade V_100ug/ml                   | 28.335      | 0.109       |
| 56               | Ovalbumin_from Chicken Egg White_Grade V_Periodate-Treated_100ug/ml | 21.938      | 0.034       |
| 58               | Trypsin Inhibitor (Ovomucoid)_from Chicken Egg White_100ug/ml       | -0.480      | -0.312      |
| 60               | Invertase_from Saccharomyces cerevisiae_Grade VII_100ug/ml          | 0.418       | -0.148      |
| 62               | RNase B_from Bovine Pancreas_100ug/ml                               | -0.074      | 0.466       |
| 64               | Horse radish Peroxidase (HRP)_100ug/ml                              | 0.141       | -0.084      |
| 66               | Schistosoma mansoni Egg Antigen (SEA)_100ug/ml                      | 42.779      | 3.817       |
| 68               | Haptoglobin from Pooled Human Plasma_100ug/ml                       | 34.227      | 0.898       |
| 70               | slgA from Human Colostrum_100ug/ml                                  | 23.941      | 3.153       |
| 72               | Vitronectin_from Human Plasma_100ug/ml                              | 32.111      | -0.006      |

Key:

|             |                                                                                    |
|-------------|------------------------------------------------------------------------------------|
| Green       | = expected binder based on previous demonstration of glycan determinant expression |
| Light Green | = dose-independent binder or known off-target binder                               |
| Yellow      | = bound by fluorescent probe alone                                                 |
| Light Blue  | = binder (SNR ≥ 5.000)                                                             |
| Red         | = non-binder (SNR < 5.000)                                                         |

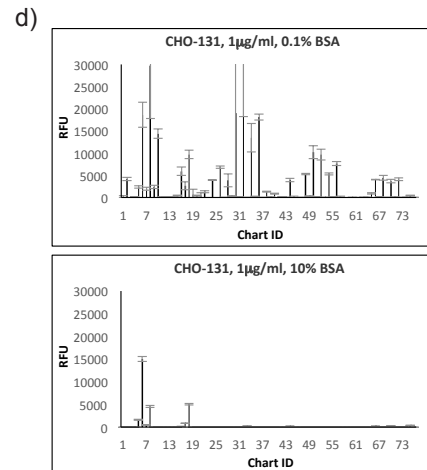

**Supplementary Figure S11.** BSA concentration empirically affects Glycan-Binding Protein binding Sensitivity and Specificity **A.** Comparison of the SNRs for SNA (1µg/ml) binding to

glycoprotein microarray v2 with 0.1% or 10% BSA in the CHO-131 binding buffer. SNRs  $\geq 5.000$ , representing binding, are highlighted in green while SNRs  $< 5.000$ , representing non-binding, are highlighted in red. Yellow-green highlighting represents expected SNA binders (glycoproteins expressing known SNA binding determinants), yellow highlighting indicates glycoproteins that were bound by SNA in a dose-dependent manner but are not known to express SNA determinants, and pink highlighting represents off-target (non-glycan-specific) targets of SNA. The 100 $\mu\text{g}/\text{ml}$  but not 10 $\mu\text{g}/\text{ml}$  glycoproteins are included in this table. **B.** Graphs of 1 $\mu\text{g}/\text{ml}$  SNA binding to glycoprotein microarray v2 in the presence of either 0.1% BSA or 10% BSA in the SNA binding buffer. The graphs indicate the average RFU for each glycoprotein, and error bars represent the standard deviation. **C.** Comparison of the SNRs for CHO-131 (1 $\mu\text{g}/\text{ml}$ ) binding to glycoprotein microarray v2 with 0.1% or 10% BSA in the CHO-131 binding buffer. SNRs  $\geq 5.000$ , representing binding, are highlighted in green while SNRs  $< 5.000$ , representing non-binding, are highlighted in red. Yellow-green highlighting represents expected CHO-131 binders, lavender highlighting indicates glycoproteins that were bound by the goat anti-mouse IgM-Alexa Fluor 488 fluorescent probe (probe only) but not CHO-131, and pink highlighting represents off-target (non-glycan-specific) targets of CHO-131. The 100 $\mu\text{g}/\text{ml}$  but not 10 $\mu\text{g}/\text{ml}$  glycoproteins are included in this table. **D.** Graphs of 1 $\mu\text{g}/\text{ml}$  CHO-131 binding to glycoprotein microarray v2 in the presence of either 0.1% BSA or 10% BSA in the CHO-131 binding buffer. The graphs indicate the average RFU for each glycoprotein, and error bars represent the standard deviation.

Figure 3a. Thyroglobulin

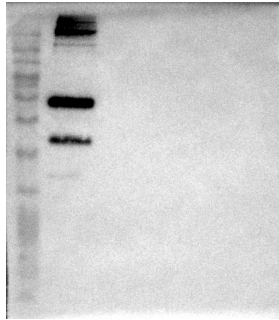

Figure 3a. Mucin and figure 5b asialofetuin

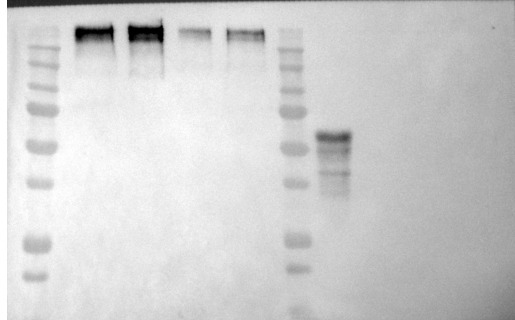

Figure 3b. Sulfatide

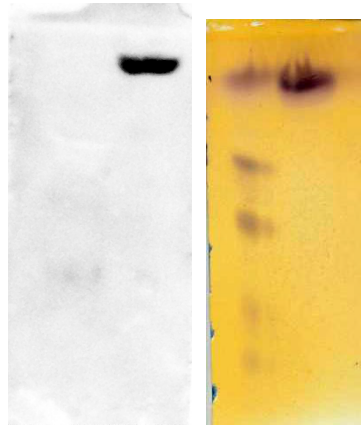

Figure 5a. Human plasma and purified human plasma glycoproteins

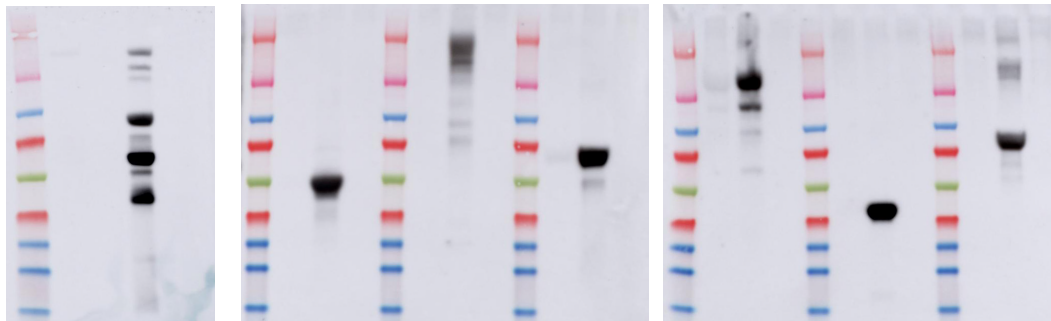

**Supplementary Figure S12.** Complete western blots and lipid blots for Figures 3 and 5. The orcinol stained lipid TLC plate is included to demonstrate the presence of the gangliosides and sulfatide lipids.

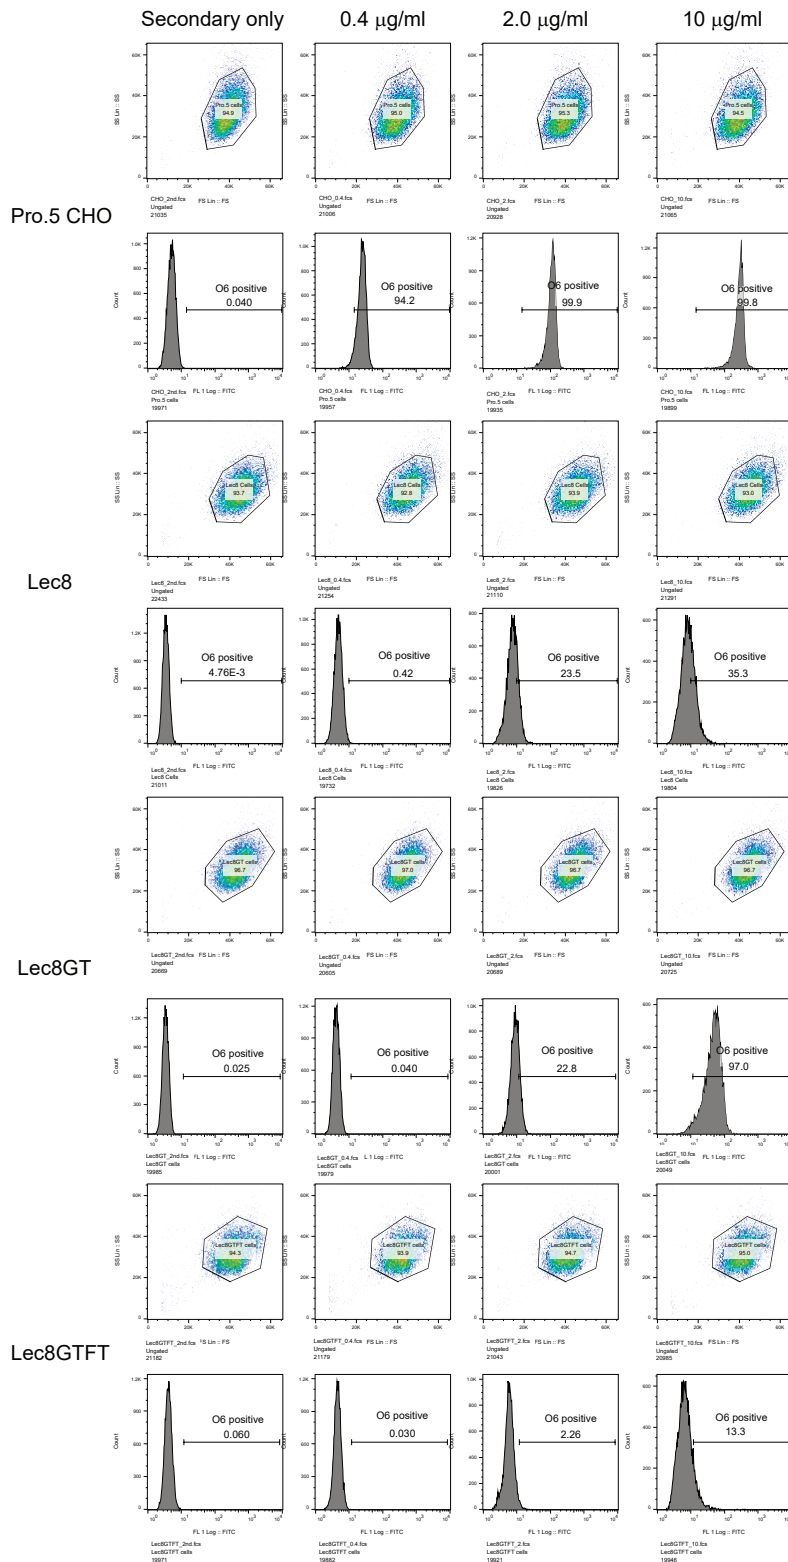

**Supplementary Figure S13.** Gating strategy of CHO cell lines stained with O6.

## Supplementary References

1. Xia, B., et al., Altered O-glycosylation and sulfation of airway mucins associated with cystic fibrosis. *Glycobiology*, 2005. **15**(8): p. 747-75.
2. Shultz, M.A., et al., Optimized Blocking Of Porous Nitrocellulose Films For Sensitive Protein Microarrays. *Biotechniques*, 2013. **54**(4): p. 223-225.
3. Stillman, B.A. and J.L. Tonkinson, FAST slides: a novel surface for microarrays. *Biotechniques*, 2000. **29**(3): p. 630-5.
